# Supplementary material for: Microorganism-based monodisperse microcapsules: encapsulation of the fungicide tebuconazole and its controlled release properties
Source: Royal Society of Chemistry journal article supplement (doi:10.1039/c5ra01629k), 2015-01-01
Supplement: c5ra01629k1.pdf [file c5ra01629k1.pdf]

## Supporting information

### **Microorganisms-based monodisperse microcapsules: encapsulation of the fungicide tebuconazole and its controlled release properties**

Bo Zhang,<sup>a</sup> Teng Zhang,<sup>b</sup> Quanxi Wang<sup>b</sup> and Tianrui Ren<sup>\*b</sup>

<sup>a</sup> State Key Laboratory Breeding Base of Green Pesticide and Agricultural

Bioengineering/ Key Laboratory of Green Pesticide and Agricultural Bioengineering,

Ministry of Education, Guizhou University, Guiyang, 550025, P. R. China

<sup>b</sup>The Key Laboratory of Resource Chemistry of Ministry of Education, The development

centre of plant germplasm resources, College of Life and Environmental science,

Shanghai Normal University, 100 Guilin Road, Shanghai, 200234, P. R. China

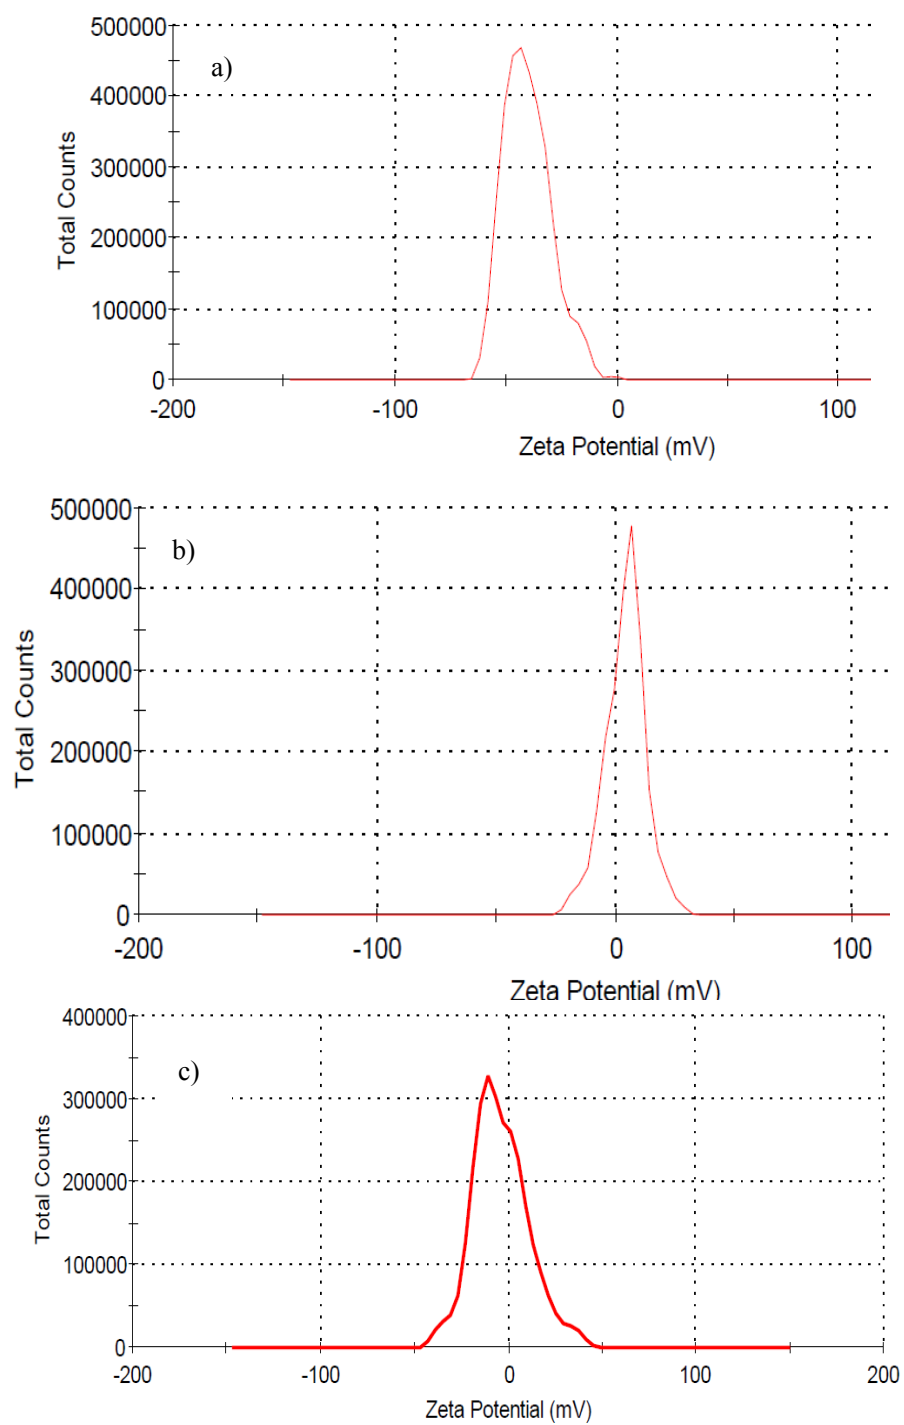

**Figure S1.** Zeta potential of the TEB-PCC spheres (a), UF prepolymers (b), and TEB-PCC@UF (c).

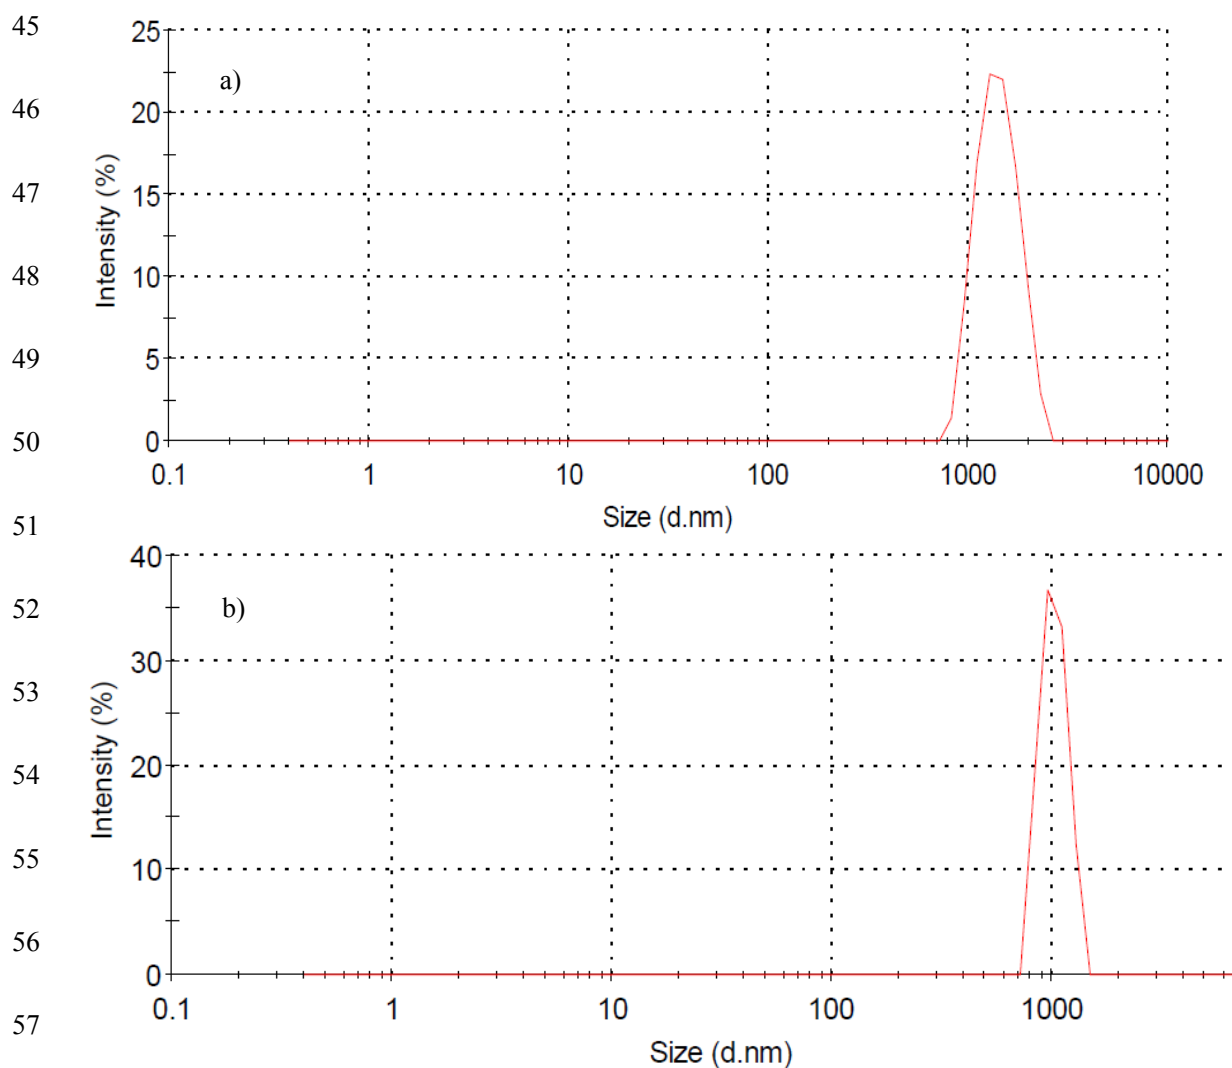

**Figure S2.** The particle size distribution curves of PCC 6803 (a), and TEB-PCC@UF (b).

### 67 Adsorption isotherm of tebu on Micy powder

68 As in previous reports,<sup>1,2</sup> the sorption isotherms were determined by batch equilibration  
69 of 0.05 g of PCC 6803 cells with 50 mL of aqueous solutions of tebu of varied initial  
70 concentrations (50.0-800.0 mg/L) in absolute ethanol. Experiments were carried out in a  
71 thermostatic shaker bath at  $30 \pm 0.1$  °C for 24 h. Preliminary experiments were conducted  
72 for various time intervals to determine when sorption equilibrium was reached. The  
73 sorption equilibrium time required for tebu was less than 24 h. After equilibration, the  
74 equilibrium concentration and the adsorption amount of tebu was determined by UV-vis  
75 spectrophotometer as described in the kinetic studies above. Blanks without tebu and  
76 triplicates of each sorption point were used for each series of experiments

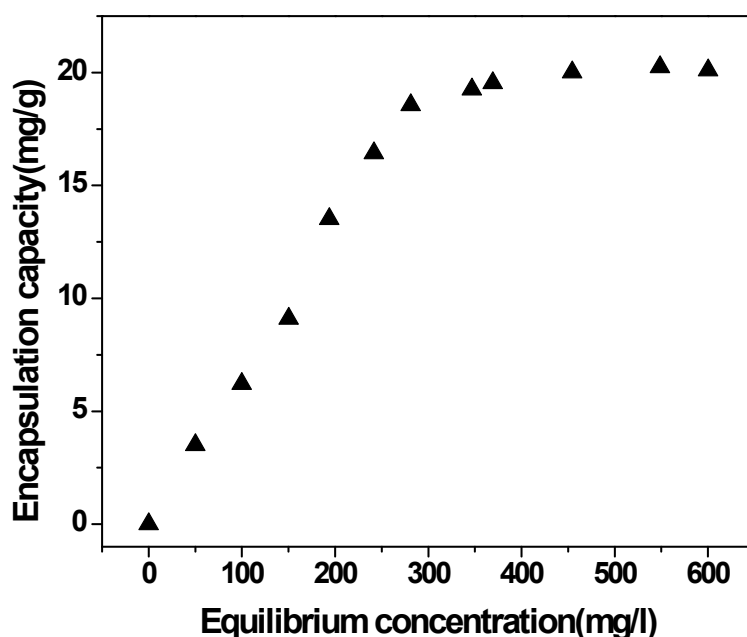

77  
78 **Figure S3.** Adsorption isotherms of TEB on PCC 6803 in isopropanol solvent

79

80

#### 81 **S4. The number density of active sites for TEB onto one PCC 6803 cell sphere**

82 Density of active sites on PCC 6803 cells has a great influence on the adsorption  
83 capacity. In order to explore the density of active sites in PCC 6803 cell, the number of  
84 TEB molecules adsorbed onto each PCC 6803 cell ball surface was calculated by  
85 considering the PCC 6803 cell ball as a rigid sphere of equal size in three directions.  
86 Although the spherical particles of equal size have different packing arrangements,<sup>3</sup> we  
87 selected simple cubic packing model in this study for simplicity. In this model one sphere  
88 touches four other spheres, 52.4% of the volume is occupied and the remaining 47.6% of  
89 the volume is empty. According to the literature,<sup>4</sup> the bulk density ( $\rho$ ) of PCC 6803 after  
90 vacuum pumping is 0.63 g/cm<sup>3</sup>. Within 1 cm<sup>3</sup> of cube, the volume occupied ( $V_{total}$ ) of  
91 PCC 6803 cell spheres is 0.52 cm<sup>3</sup>. The volume  $V_{sphere}$  of a PCC 6803 cell sphere is as  
92 follows:

$$93 \quad V_{sphere} = \frac{4\pi r^3}{3} = 1.68 \times 10^{-12} \text{ cm}^3 \quad (3)$$

94 Where  $r$  is the radius of the sphere, the average size of PCC 6803 cell spheres is 1.474  $\mu\text{m}$ .

95 The number  $N_1$  of PCC 6803 cell spheres within 1 cm<sup>3</sup> of cube can be calculated as:

$$96 \quad N_1 = V_{total} / V_{sphere} = 3.10 \times 10^{11} \quad (4)$$

97 The number  $N_2$  of 1 g of PCC 6803 cell spheres is obtained as:

$$98 \quad N_2 = N_1 / \rho = 4.92 \times 10^{11} \quad (5)$$

99 The number  $N_3$  of TEB molecules adsorbed onto 1 g of PCC 6803 cell spheres is given by:

$$100 \quad N_3 = N_A \times Q_e / M_{TEB} = 3.93 \times 10^{19} \quad (6)$$

101 Where  $N_A$  is Avogadro constant ( $6.02 \times 10^{23}$ );  $Q_e$  is the adsorption amount of TEB on PCC

102 6803 cell in isopropanol (20.10 mg/g);  $M_{TEB}$  is molecular weight of TEB (307.8).

103 The number  $N_4$  of TEB molecules adsorbed onto one PCC 6803 cell sphere can be  
104 calculated from:

$$105 \quad N_4 = N_3 / N_2 = 7.99 \times 10^7 \quad (7)$$

106 Thus, the number density of active sites for TEB onto one PCC 6803 cell sphere is  
107  $7.99 \times 10^7$ .

108

109

110

111

112

113

114

115

116

117

118

119

120

121

122

123

124

125

126

127

128 **Table S1.** Control efficacy of (a) TEB-PCC@UF microcapsules and (b) commercial  
129 formulation on wheat powdery mildew after 4, 8 and 12 day sprayed wheat at 24 h before  
130 inoculation.

| Concentration<br>(ppm) | Formulation | Control Efficacy <sup>a</sup> (%) |              |              |
|------------------------|-------------|-----------------------------------|--------------|--------------|
|                        |             | 4d                                | 8d           | 12d          |
| 2.5                    | a           | 56.50 ± 1.22                      | 53.75 ± 1.40 | 46.25 ± 1.12 |
|                        | b           | 47.75 ± 1.73                      | 39.00 ± 1.66 | 22.75 ± 0.98 |
| 5                      | a           | 67.00 ± 0.79                      | 55.75 ± 1.27 | 52.00 ± 0.71 |
|                        | b           | 62.00 ± 1.32                      | 45.75 ± 1.08 | 27.50 ± 0.89 |
| 10                     | a           | 77.50 ± 2.10                      | 77.50 ± 1.31 | 77.75 ± 1.92 |
|                        | b           | 68.50 ± 1.40                      | 62.00 ± 1.57 | 43.50 ± 1.20 |
| 20                     | a           | 84.25 ± 0.90                      | 83.75 ± 0.71 | 83.00 ± 1.80 |
|                        | b           | 75.25 ± 1.37                      | 71.25 ± 1.60 | 52.00 ± 1.90 |
| 30                     | a           | 91.75 ± 1.80                      | 80.75 ± 1.37 | 81.75 ± 2.10 |
|                        | b           | 82.75 ± 1.21                      | 69.00 ± 0.78 | 50.50 ± 1.36 |
| 40                     | a           | 95.75 ± 2.31                      | 88.25 ± 1.10 | 83.75 ± 1.75 |
|                        | b           | 91.00 ± 2.10                      | 75.25 ± 1.53 | 51.00 ± 2.14 |

<sup>a</sup> Values are the mean ± SD of three replicates.

132

**Table S2.** Control efficacy of (a) TEB-PCC@UF microcapsules and (b) commercial formulation on wheat powdery mildew after 4, 8 and 12 day sprayed wheat at 48 h before inoculation.

| Concentration<br>(ppm) | Formulation | Control Efficacy <sup>a</sup> (%) |              |              |
|------------------------|-------------|-----------------------------------|--------------|--------------|
|                        |             | 4d                                | 8d           | 12d          |
| 2.5                    | a           | 68.00 ± 1.78                      | 60.00 ± 0.97 | 52.50 ± 1.22 |
|                        | b           | 49.25 ± 2.10                      | 39.50 ± 0.66 | 20.50 ± 1.54 |
| 5                      | a           | 69.25 ± 1.50                      | 70.00 ± 2.21 | 69.25 ± 1.78 |
|                        | b           | 64.25 ± 1.47                      | 59.00 ± 2.18 | 34.25 ± 1.40 |
| 10                     | a           | 81.00 ± 2.20                      | 81.00 ± 1.85 | 78.50 ± 1.60 |
|                        | b           | 69.00 ± 1.36                      | 63.45 ± 0.78 | 44.50 ± 0.90 |
| 20                     | a           | 85.25 ± 1.80                      | 86.25 ± 1.13 | 80.75 ± 1.73 |
|                        | b           | 78.50 ± 2.61                      | 72.25 ± 1.62 | 52.50 ± 2.30 |
| 30                     | a           | 92.25 ± 1.80                      | 84.50 ± 2.31 | 81.75 ± 1.85 |
|                        | b           | 82.00 ± 2.12                      | 72.00 ± 1.75 | 50.75 ± 1.52 |
| 40                     | a           | 95.95 ± 2.30                      | 89.75 ± 2.90 | 82.75 ± 1.95 |
|                        | b           | 92.75 ± 1.17                      | 76.00 ± 2.45 | 51.25 ± 2.30 |

<sup>a</sup> Values are the mean ± SD of three replicates.

137

**Table S3.** Control efficacy of (a) TEB-PCC@UF microcapsules and (b) commercial formulation on wheat powdery mildew after 4, 8 and 12 day sprayed wheat at 72 h before inoculation.

| Concentration<br>(ppm) | Formulation | Control Efficacy (%) |              |              |
|------------------------|-------------|----------------------|--------------|--------------|
|                        |             | 4d                   | 8d           | 12d          |
| 2.5                    | a           | 63.00 ± 1.52         | 56.25 ± 0.95 | 43.50 ± 1.70 |
|                        | b           | 49.25 ± 1.45         | 40.00 ± 1.15 | 20.00 ± 1.54 |
| 5                      | a           | 70.25 ± 1.78         | 69.00 ± 1.60 | 60.25 ± 1.48 |
|                        | b           | 65.25 ± 1.90         | 61.00 ± 2.21 | 36.25 ± 2.32 |
| 10                     | a           | 81.50 ± 1.82         | 81.25 ± 2.15 | 69.50 ± 1.35 |
|                        | b           | 73.00 ± 2.15         | 64.00 ± 2.07 | 41.50 ± 1.75 |
| 20                     | a           | 86.25 ± 1.32         | 86.45 ± 2.25 | 76.75 ± 1.78 |
|                        | b           | 79.50 ± 0.95         | 73.00 ± 1.20 | 53.50 ± 2.01 |
| 30                     | a           | 93.00 ± 1.82         | 85.50 ± 1.57 | 76.75 ± 2.20 |
|                        | b           | 84.00 ± 2.65         | 71.25 ± 1.47 | 51.25 ± 1.89 |
| 40                     | a           | 96.25 ± 2.30         | 90.75 ± 1.25 | 80.75 ± 1.72 |
|                        | b           | 92.45 ± 2.12         | 77.00 ± 1.20 | 52.25 ± 1.68 |

<sup>a</sup> Values are the mean ± SD of three replicates.

## References

- 1 R. Celis, M. C. Hermosín, M. J. Carrizosa and J. Cornejo, *J. Agric. Food Chem.* 2002, **50**, 2324-2330.
- 2 M. Fernández-Pérez, F. Flores-Céspedes, E. González-Pradas, M. Villafranca-Sánchez, S. Pérez-García and F. J. Garrido-Herrera, *J. Agric. Food Chem.* 2004, **52**, 3888-3893.
- 3 S. M. Zhou, N. Wei and Y. H. Chen, *Petrol. Drill. Tech.* 2007, **10**, 46-49.
- 4 S. H. Ling, Solid Formulation, 3rd ed.; Chemical Industry Press: Beijing, China, 2003, pp 405.
